# Supplementary material for: Projections of maternal mortality ratios in Bangladesh
Source: PubMed Central journal article supplement (PMC10811434; doi:10.7189/jogh.14.04015), 2024-01-26
Supplement: jogh-14-04015-s001.pdf [file jogh-14-04015-s001.pdf]

## Supplementary Material

### Supplementary Tables

**Table S1. GATHER Statement**

| Item #                                                                                                | Checklist item                                                                                                                                                                                                                                                                                                                                                                            | Reported on page # |
|-------------------------------------------------------------------------------------------------------|-------------------------------------------------------------------------------------------------------------------------------------------------------------------------------------------------------------------------------------------------------------------------------------------------------------------------------------------------------------------------------------------|--------------------|
| <b>Objectives and funding</b>                                                                         |                                                                                                                                                                                                                                                                                                                                                                                           |                    |
| 1                                                                                                     | Define the indicator(s), populations (including age, sex, and geographic entities), and time period(s) for which estimates were made.                                                                                                                                                                                                                                                     | 3-8                |
| 2                                                                                                     | List the funding sources for the work.                                                                                                                                                                                                                                                                                                                                                    | 21                 |
| <b>Data Inputs</b>                                                                                    |                                                                                                                                                                                                                                                                                                                                                                                           |                    |
| <i>For all data inputs from multiple sources that are synthesized as part of the study:</i>           |                                                                                                                                                                                                                                                                                                                                                                                           |                    |
| 3                                                                                                     | Describe how the data were identified and how the data were accessed.                                                                                                                                                                                                                                                                                                                     | 3-4                |
| 4                                                                                                     | Specify the inclusion and exclusion criteria. Identify all ad-hoc exclusions.                                                                                                                                                                                                                                                                                                             | 4-5                |
| 5                                                                                                     | Provide information on all included data sources and their main characteristics. For each data source used, report reference information or contact name/institution, population represented, data collection method, year(s) of data collection, sex and age range, diagnostic criteria or measurement method, and sample size, as relevant.                                             | 3-4, 10            |
| 6                                                                                                     | Identify and describe any categories of input data that have potentially important biases (e.g., based on characteristics listed in item 5).                                                                                                                                                                                                                                              | NA                 |
| <i>For data inputs that contribute to the analysis but were not synthesized as part of the study:</i> |                                                                                                                                                                                                                                                                                                                                                                                           |                    |
| 7                                                                                                     | Describe and give sources for any other data inputs.                                                                                                                                                                                                                                                                                                                                      | NA                 |
| <i>For all data inputs:</i>                                                                           |                                                                                                                                                                                                                                                                                                                                                                                           |                    |
| 8                                                                                                     | Provide all data inputs in a file format from which data can be efficiently extracted (e.g., a spreadsheet rather than a PDF), including all relevant meta-data listed in item 5. For any data inputs that cannot be shared because of ethical or legal reasons, such as third-party ownership, provide a contact name or the name of the institution that retains the right to the data. | 10-12              |
| <b>Data analysis</b>                                                                                  |                                                                                                                                                                                                                                                                                                                                                                                           |                    |
| 9                                                                                                     | Provide a conceptual overview of the data analysis method. A diagram may be helpful.                                                                                                                                                                                                                                                                                                      | 3                  |
| 10                                                                                                    | Provide a detailed description of all steps of the analysis, including mathematical formulae. This description should cover, as relevant, data cleaning, data pre-processing, data adjustments and weighting of data sources, and mathematical or statistical model(s).                                                                                                                   | 3-8<br>Figure S1-4 |
| 11                                                                                                    | Describe how candidate models were evaluated and how the final model(s) were selected.                                                                                                                                                                                                                                                                                                    | 7                  |
| 12                                                                                                    | Provide the results of an evaluation of model performance, if done, as well as the results of any relevant sensitivity analysis.                                                                                                                                                                                                                                                          | 10<br>Figure S5    |
| 13                                                                                                    | Describe methods for calculating uncertainty of the estimates. State which sources of uncertainty were, and were not, accounted for in the uncertainty analysis.                                                                                                                                                                                                                          | 15-16              |
| 14                                                                                                    | State how analytic or statistical source code used to generate estimates can be accessed.                                                                                                                                                                                                                                                                                                 | 21                 |
| <b>Results and Discussion</b>                                                                         |                                                                                                                                                                                                                                                                                                                                                                                           |                    |
| 15                                                                                                    | Provide published estimates in a file format from which data can be efficiently extracted.                                                                                                                                                                                                                                                                                                | 10-11              |
| 16                                                                                                    | Report a quantitative measure of the uncertainty of the estimates (e.g. uncertainty intervals).                                                                                                                                                                                                                                                                                           | Table S2-S6        |
| 17                                                                                                    | Interpret results in light of existing evidence. If updating a previous set of estimates, describe the reasons for changes in estimates.                                                                                                                                                                                                                                                  | 15-16              |
| 18                                                                                                    | Discuss limitations of the estimates. Include a discussion of any modelling assumptions or data limitations that affect interpretation of the estimates.                                                                                                                                                                                                                                  | 19-20              |

**Table S2.** Observed and reference forecast of maternal mortality ratios in Bangladesh from 1993 to 2060

| Year | Observed and reference forecast of maternal mortality ratios |                          |        |
|------|--------------------------------------------------------------|--------------------------|--------|
|      |                                                              | 95% prediction intervals |        |
| 1993 | 452.00                                                       | 452.00                   | 452.00 |
| 1994 | 459.00                                                       | 459.00                   | 459.00 |
| 1995 | 479.00                                                       | 479.00                   | 479.00 |
| 1996 | 486.94                                                       | 486.94                   | 486.94 |
| 1997 | 481.14                                                       | 481.14                   | 481.14 |
| 1998 | 466.87                                                       | 466.87                   | 466.87 |
| 1999 | 449.40                                                       | 449.40                   | 449.40 |
| 2000 | 434.00                                                       | 434.00                   | 434.00 |
| 2001 | 423.00                                                       | 423.00                   | 423.00 |
| 2002 | 410.00                                                       | 410.00                   | 410.00 |
| 2003 | 395.00                                                       | 395.00                   | 395.00 |
| 2004 | 372.00                                                       | 372.00                   | 372.00 |
| 2005 | 343.00                                                       | 343.00                   | 343.00 |
| 2006 | 315.00                                                       | 315.00                   | 315.00 |
| 2007 | 297.00                                                       | 297.00                   | 297.00 |
| 2008 | 280.00                                                       | 280.00                   | 280.00 |
| 2009 | 269.00                                                       | 269.00                   | 269.00 |
| 2010 | 258.00                                                       | 258.00                   | 258.00 |
| 2011 | 248.00                                                       | 248.00                   | 248.00 |
| 2012 | 238.00                                                       | 238.00                   | 238.00 |
| 2013 | 227.00                                                       | 227.00                   | 227.00 |
| 2014 | 214.00                                                       | 214.00                   | 214.00 |
| 2015 | 200.00                                                       | 200.00                   | 200.00 |
| 2016 | 186.00                                                       | 186.00                   | 186.00 |
| 2017 | 173.00                                                       | 173.00                   | 173.00 |
| 2018 | 164.63                                                       | 147.15                   | 182.12 |
| 2019 | 156.16                                                       | 132.82                   | 179.49 |
| 2020 | 147.66                                                       | 120.63                   | 174.69 |

---

|      |        |        |        |
|------|--------|--------|--------|
| 2021 | 140.06 | 110.46 | 169.66 |
| 2022 | 133.36 | 101.90 | 164.83 |
| 2023 | 127.57 | 94.72  | 160.41 |
| 2024 | 121.75 | 87.87  | 155.63 |
| 2025 | 115.93 | 81.26  | 150.59 |
| 2026 | 110.54 | 75.27  | 145.81 |
| 2027 | 107.44 | 71.70  | 143.17 |
| 2028 | 104.78 | 68.68  | 140.87 |
| 2029 | 102.11 | 65.74  | 138.48 |
| 2030 | 99.43  | 62.84  | 136.01 |
| 2031 | 96.96  | 60.21  | 133.72 |
| 2032 | 94.72  | 57.84  | 131.60 |
| 2033 | 92.70  | 55.71  | 129.68 |
| 2034 | 90.66  | 53.60  | 127.73 |
| 2035 | 88.62  | 51.50  | 125.75 |
| 2036 | 86.80  | 49.63  | 123.98 |
| 2037 | 85.21  | 48.00  | 122.42 |
| 2038 | 83.60  | 46.36  | 120.84 |
| 2039 | 81.99  | 44.73  | 119.25 |
| 2040 | 80.38  | 43.10  | 117.66 |
| 2041 | 78.87  | 41.57  | 116.16 |
| 2042 | 77.47  | 40.16  | 114.77 |
| 2043 | 76.18  | 38.87  | 113.49 |
| 2044 | 74.88  | 37.56  | 112.20 |
| 2045 | 73.58  | 36.26  | 110.91 |
| 2046 | 72.62  | 35.30  | 109.95 |
| 2047 | 71.66  | 34.33  | 108.99 |
| 2048 | 70.69  | 33.36  | 108.02 |
| 2049 | 69.78  | 32.44  | 107.11 |
| 2050 | 68.92  | 31.58  | 106.26 |
| 2051 | 68.12  | 30.78  | 105.45 |
| 2052 | 67.31  | 29.97  | 104.65 |
| 2053 | 66.50  | 29.17  | 103.84 |

---

---

|      |       |       |        |
|------|-------|-------|--------|
| 2054 | 65.69 | 28.35 | 103.03 |
| 2055 | 65.00 | 27.66 | 102.34 |
| 2056 | 64.52 | 27.18 | 101.86 |
| 2057 | 64.05 | 26.71 | 101.39 |
| 2058 | 63.57 | 26.23 | 100.91 |
| 2059 | 63.09 | 25.75 | 100.43 |
| 2060 | 62.61 | 25.27 | 99.95  |

---

Maternal mortality ratios are expressed per 100,000 live births.

**Table S3.** Observed and predicted maternal mortality ratios for scenario 1

| Year | Observed and predicted maternal mortality ratios for scenario 1. |                          |        |
|------|------------------------------------------------------------------|--------------------------|--------|
|      |                                                                  | 95% prediction intervals |        |
| 1993 | 452.00                                                           | 452.00                   | 452.00 |
| 1994 | 459.00                                                           | 459.00                   | 459.00 |
| 1995 | 479.00                                                           | 479.00                   | 479.00 |
| 1996 | 486.94                                                           | 486.94                   | 486.94 |
| 1997 | 481.14                                                           | 481.14                   | 481.14 |
| 1998 | 466.87                                                           | 466.87                   | 466.87 |
| 1999 | 449.40                                                           | 449.40                   | 449.40 |
| 2000 | 434.00                                                           | 434.00                   | 434.00 |
| 2001 | 423.00                                                           | 423.00                   | 423.00 |
| 2002 | 410.00                                                           | 410.00                   | 410.00 |
| 2003 | 395.00                                                           | 395.00                   | 395.00 |
| 2004 | 372.00                                                           | 372.00                   | 372.00 |
| 2005 | 343.00                                                           | 343.00                   | 343.00 |
| 2006 | 315.00                                                           | 315.00                   | 315.00 |
| 2007 | 297.00                                                           | 297.00                   | 297.00 |
| 2008 | 280.00                                                           | 280.00                   | 280.00 |
| 2009 | 269.00                                                           | 269.00                   | 269.00 |
| 2010 | 258.00                                                           | 258.00                   | 258.00 |
| 2011 | 248.00                                                           | 248.00                   | 248.00 |
| 2012 | 238.00                                                           | 238.00                   | 238.00 |
| 2013 | 227.00                                                           | 227.00                   | 227.00 |
| 2014 | 214.00                                                           | 214.00                   | 214.00 |
| 2015 | 200.00                                                           | 200.00                   | 200.00 |
| 2016 | 186.00                                                           | 186.00                   | 186.00 |
| 2017 | 173.00                                                           | 173.00                   | 173.00 |
| 2018 | 159.85                                                           | 142.36                   | 177.33 |
| 2019 | 146.68                                                           | 123.34                   | 170.01 |
| 2020 | 133.49                                                           | 106.45                   | 160.52 |
| 2021 | 120.28                                                           | 90.68                    | 149.88 |

---

|      |        |       |        |
|------|--------|-------|--------|
| 2022 | 107.05 | 75.59 | 138.52 |
| 2023 | 93.81  | 60.97 | 126.66 |
| 2024 | 80.56  | 46.68 | 114.44 |
| 2025 | 74.62  | 39.95 | 109.28 |
| 2026 | 68.66  | 33.39 | 103.93 |
| 2027 | 62.69  | 26.96 | 98.43  |
| 2028 | 56.71  | 20.62 | 92.81  |
| 2029 | 54.39  | 18.02 | 90.76  |
| 2030 | 52.05  | 15.46 | 88.63  |
| 2031 | 49.70  | 12.95 | 86.45  |
| 2032 | 47.34  | 10.46 | 84.23  |
| 2033 | 44.98  | 7.99  | 81.96  |
| 2034 | 44.43  | 7.37  | 81.50  |
| 2035 | 43.88  | 6.76  | 81.00  |
| 2036 | 43.32  | 6.15  | 80.49  |
| 2037 | 42.75  | 5.54  | 79.96  |
| 2038 | 42.18  | 4.94  | 79.42  |
| 2039 | 41.60  | 4.34  | 78.86  |
| 2040 | 41.01  | 3.73  | 78.29  |
| 2041 | 40.42  | 3.13  | 77.71  |
| 2042 | 39.82  | 2.52  | 77.13  |
| 2043 | 39.22  | 1.91  | 76.53  |
| 2044 | 39.53  | 2.21  | 76.85  |
| 2045 | 39.83  | 2.51  | 77.16  |
| 2046 | 40.13  | 2.80  | 77.46  |
| 2047 | 40.42  | 3.09  | 77.76  |
| 2048 | 40.72  | 3.38  | 78.05  |
| 2049 | 41.00  | 3.67  | 78.34  |
| 2050 | 41.28  | 3.95  | 78.62  |
| 2051 | 41.56  | 4.23  | 78.90  |
| 2052 | 41.84  | 4.50  | 79.18  |
| 2053 | 42.11  | 4.77  | 79.45  |
| 2054 | 42.38  | 5.04  | 79.72  |

---

---

|      |       |      |       |
|------|-------|------|-------|
| 2055 | 42.65 | 5.31 | 79.99 |
| 2056 | 42.92 | 5.58 | 80.26 |
| 2057 | 43.18 | 5.84 | 80.52 |
| 2058 | 43.44 | 6.10 | 80.78 |
| 2059 | 43.70 | 6.36 | 81.04 |
| 2060 | 43.95 | 6.61 | 81.29 |

---

Maternal mortality ratios are expressed per 100,000 live births.

**Table S4.** Observed and predicted maternal mortality ratios for scenario 2

| Year | Observed and predicted maternal mortality ratios for scenario 2 |                          |        |
|------|-----------------------------------------------------------------|--------------------------|--------|
|      |                                                                 | 95% prediction intervals |        |
| 1993 | 452.00                                                          | 452.00                   | 452.00 |
| 1994 | 459.00                                                          | 459.00                   | 459.00 |
| 1995 | 479.00                                                          | 479.00                   | 479.00 |
| 1996 | 486.94                                                          | 486.94                   | 486.94 |
| 1997 | 481.14                                                          | 481.14                   | 481.14 |
| 1998 | 466.87                                                          | 466.87                   | 466.87 |
| 1999 | 449.40                                                          | 449.40                   | 449.40 |
| 2000 | 434.00                                                          | 434.00                   | 434.00 |
| 2001 | 423.00                                                          | 423.00                   | 423.00 |
| 2002 | 410.00                                                          | 410.00                   | 410.00 |
| 2003 | 395.00                                                          | 395.00                   | 395.00 |
| 2004 | 372.00                                                          | 372.00                   | 372.00 |
| 2005 | 343.00                                                          | 343.00                   | 343.00 |
| 2006 | 315.00                                                          | 315.00                   | 315.00 |
| 2007 | 297.00                                                          | 297.00                   | 297.00 |
| 2008 | 280.00                                                          | 280.00                   | 280.00 |
| 2009 | 269.00                                                          | 269.00                   | 269.00 |
| 2010 | 258.00                                                          | 258.00                   | 258.00 |
| 2011 | 248.00                                                          | 248.00                   | 248.00 |
| 2012 | 238.00                                                          | 238.00                   | 238.00 |
| 2013 | 227.00                                                          | 227.00                   | 227.00 |
| 2014 | 214.00                                                          | 214.00                   | 214.00 |
| 2015 | 200.00                                                          | 200.00                   | 200.00 |
| 2016 | 186.00                                                          | 186.00                   | 186.00 |
| 2017 | 173.00                                                          | 173.00                   | 173.00 |
| 2018 | 164.24                                                          | 146.76                   | 181.73 |
| 2019 | 155.47                                                          | 132.14                   | 178.80 |
| 2020 | 146.68                                                          | 119.64                   | 173.71 |
| 2021 | 137.86                                                          | 108.26                   | 167.47 |



|      |        |       |        |
|------|--------|-------|--------|
| 2022 | 129.04 | 97.57 | 160.50 |
| 2023 | 120.56 | 87.72 | 153.40 |
| 2024 | 112.07 | 78.19 | 145.95 |
| 2025 | 103.56 | 68.89 | 138.23 |
| 2026 | 95.04  | 59.77 | 130.31 |
| 2027 | 86.51  | 50.77 | 122.24 |
| 2028 | 77.96  | 41.87 | 114.06 |
| 2029 | 69.41  | 33.04 | 105.78 |
| 2030 | 60.84  | 24.26 | 97.43  |
| 2031 | 58.49  | 21.74 | 95.25  |
| 2032 | 56.14  | 19.25 | 93.02  |
| 2033 | 53.77  | 16.78 | 90.75  |
| 2034 | 51.39  | 14.33 | 88.46  |
| 2035 | 49.01  | 11.89 | 86.13  |
| 2036 | 48.45  | 11.28 | 85.62  |
| 2037 | 47.88  | 10.67 | 85.09  |
| 2038 | 47.31  | 10.07 | 84.55  |
| 2039 | 46.73  | 9.47  | 83.99  |
| 2040 | 46.14  | 8.86  | 83.42  |
| 2041 | 45.55  | 8.26  | 82.84  |
| 2042 | 44.95  | 7.65  | 82.26  |
| 2043 | 44.35  | 7.04  | 81.66  |
| 2044 | 43.74  | 6.42  | 81.06  |
| 2045 | 43.13  | 5.81  | 80.45  |
| 2046 | 43.43  | 6.10  | 80.76  |
| 2047 | 43.72  | 6.39  | 81.05  |
| 2048 | 44.01  | 6.68  | 81.35  |
| 2049 | 44.30  | 6.96  | 81.63  |
| 2050 | 44.58  | 7.25  | 81.92  |
| 2051 | 44.86  | 7.52  | 82.20  |
| 2052 | 45.14  | 7.80  | 82.48  |
| 2053 | 45.41  | 8.07  | 82.75  |
| 2054 | 45.68  | 8.34  | 83.02  |

|      |       |      |       |
|------|-------|------|-------|
| 2055 | 45.95 | 8.61 | 83.29 |
| 2056 | 46.21 | 8.87 | 83.55 |
| 2057 | 46.48 | 9.14 | 83.82 |
| 2058 | 46.74 | 9.39 | 84.08 |
| 2059 | 46.99 | 9.65 | 84.34 |
| 2060 | 47.25 | 9.91 | 84.59 |

---

Maternal mortality ratios are expressed per 100,000 live births.

**Table S5.** Observed and predicted maternal mortality ratios for scenario 3

| Year | Observed and predicted maternal mortality ratios for scenario 3 |                          |        |
|------|-----------------------------------------------------------------|--------------------------|--------|
|      |                                                                 | 95% prediction intervals |        |
| 1993 | 452.00                                                          | 452.00                   | 452.00 |
| 1994 | 459.00                                                          | 459.00                   | 459.00 |
| 1995 | 479.00                                                          | 479.00                   | 479.00 |
| 1996 | 486.94                                                          | 486.94                   | 486.94 |
| 1997 | 481.14                                                          | 481.14                   | 481.14 |
| 1998 | 466.87                                                          | 466.87                   | 466.87 |
| 1999 | 449.40                                                          | 449.40                   | 449.40 |
| 2000 | 434.00                                                          | 434.00                   | 434.00 |
| 2001 | 423.00                                                          | 423.00                   | 423.00 |
| 2002 | 410.00                                                          | 410.00                   | 410.00 |
| 2003 | 395.00                                                          | 395.00                   | 395.00 |
| 2004 | 372.00                                                          | 372.00                   | 372.00 |
| 2005 | 343.00                                                          | 343.00                   | 343.00 |
| 2006 | 315.00                                                          | 315.00                   | 315.00 |
| 2007 | 297.00                                                          | 297.00                   | 297.00 |
| 2008 | 280.00                                                          | 280.00                   | 280.00 |
| 2009 | 269.00                                                          | 269.00                   | 269.00 |
| 2010 | 258.00                                                          | 258.00                   | 258.00 |
| 2011 | 248.00                                                          | 248.00                   | 248.00 |
| 2012 | 238.00                                                          | 238.00                   | 238.00 |
| 2013 | 227.00                                                          | 227.00                   | 227.00 |
| 2014 | 214.00                                                          | 214.00                   | 214.00 |
| 2015 | 200.00                                                          | 200.00                   | 200.00 |
| 2016 | 186.00                                                          | 186.00                   | 186.00 |
| 2017 | 173.00                                                          | 173.00                   | 173.00 |
| 2018 | 167.50                                                          | 150.01                   | 184.98 |
| 2019 | 161.88                                                          | 138.55                   | 185.21 |
| 2020 | 156.25                                                          | 129.22                   | 183.28 |
| 2021 | 151.51                                                          | 121.91                   | 181.11 |

|      |        |        |        |
|------|--------|--------|--------|
| 2022 | 147.68 | 116.21 | 179.14 |
| 2023 | 144.74 | 111.90 | 177.58 |
| 2024 | 141.79 | 107.91 | 175.67 |
| 2025 | 138.82 | 104.16 | 173.49 |
| 2026 | 136.30 | 101.03 | 171.57 |
| 2027 | 134.23 | 98.49  | 169.96 |
| 2028 | 132.60 | 96.50  | 168.69 |
| 2029 | 130.96 | 94.59  | 167.33 |
| 2030 | 129.31 | 92.72  | 165.89 |
| 2031 | 127.88 | 91.12  | 164.63 |
| 2032 | 126.66 | 89.78  | 163.55 |
| 2033 | 125.67 | 88.68  | 162.65 |
| 2034 | 124.67 | 87.60  | 161.73 |
| 2035 | 123.66 | 86.53  | 160.78 |
| 2036 | 122.64 | 85.47  | 159.81 |
| 2037 | 121.62 | 84.41  | 158.83 |
| 2038 | 120.58 | 83.35  | 157.82 |
| 2039 | 119.55 | 82.28  | 156.81 |
| 2040 | 118.50 | 81.22  | 155.78 |
| 2041 | 117.57 | 80.27  | 154.86 |
| 2042 | 116.74 | 79.44  | 154.04 |
| 2043 | 116.02 | 78.71  | 153.33 |
| 2044 | 115.53 | 78.21  | 152.85 |
| 2045 | 115.26 | 77.93  | 152.58 |
| 2046 | 114.98 | 77.66  | 152.31 |
| 2047 | 114.71 | 77.38  | 152.04 |
| 2048 | 114.42 | 77.09  | 151.76 |
| 2049 | 114.20 | 76.86  | 151.53 |
| 2050 | 114.03 | 76.69  | 151.36 |
| 2051 | 113.91 | 76.58  | 151.25 |
| 2052 | 113.80 | 76.46  | 151.14 |
| 2053 | 113.68 | 76.34  | 151.02 |
| 2054 | 113.55 | 76.21  | 150.89 |

|      |        |       |        |
|------|--------|-------|--------|
| 2055 | 113.43 | 76.09 | 150.77 |
| 2056 | 113.30 | 75.96 | 150.64 |
| 2057 | 113.17 | 75.82 | 150.51 |
| 2058 | 113.03 | 75.69 | 150.37 |
| 2059 | 112.90 | 75.55 | 150.24 |
| 2060 | 112.76 | 75.42 | 150.10 |

---

Maternal mortality ratios are expressed per 100,000 live births.

**Table S6.** Observed and predicted maternal mortality ratios for scenario 4

| Year | Observed and predicted maternal mortality ratios for scenario 4 |                          |        |
|------|-----------------------------------------------------------------|--------------------------|--------|
|      |                                                                 | 95% prediction intervals |        |
| 1993 | 452.00                                                          | 452.00                   | 452.00 |
| 1994 | 459.00                                                          | 459.00                   | 459.00 |
| 1995 | 479.00                                                          | 479.00                   | 479.00 |
| 1996 | 486.94                                                          | 486.94                   | 486.94 |
| 1997 | 481.14                                                          | 481.14                   | 481.14 |
| 1998 | 466.87                                                          | 466.87                   | 466.87 |
| 1999 | 449.40                                                          | 449.40                   | 449.40 |
| 2000 | 434.00                                                          | 434.00                   | 434.00 |
| 2001 | 423.00                                                          | 423.00                   | 423.00 |
| 2002 | 410.00                                                          | 410.00                   | 410.00 |
| 2003 | 395.00                                                          | 395.00                   | 395.00 |
| 2004 | 372.00                                                          | 372.00                   | 372.00 |
| 2005 | 343.00                                                          | 343.00                   | 343.00 |
| 2006 | 315.00                                                          | 315.00                   | 315.00 |
| 2007 | 297.00                                                          | 297.00                   | 297.00 |
| 2008 | 280.00                                                          | 280.00                   | 280.00 |
| 2009 | 269.00                                                          | 269.00                   | 269.00 |
| 2010 | 258.00                                                          | 258.00                   | 258.00 |
| 2011 | 248.00                                                          | 248.00                   | 248.00 |
| 2012 | 238.00                                                          | 238.00                   | 238.00 |
| 2013 | 227.00                                                          | 227.00                   | 227.00 |
| 2014 | 214.00                                                          | 214.00                   | 214.00 |
| 2015 | 200.00                                                          | 200.00                   | 200.00 |
| 2016 | 186.00                                                          | 186.00                   | 186.00 |
| 2017 | 173.00                                                          | 173.00                   | 173.00 |
| 2018 | 173.22                                                          | 155.74                   | 190.71 |
| 2019 | 173.33                                                          | 150.00                   | 196.66 |
| 2020 | 173.42                                                          | 146.39                   | 200.45 |
| 2021 | 173.49                                                          | 143.89                   | 203.10 |

---

|      |        |        |        |
|------|--------|--------|--------|
| 2022 | 173.55 | 142.09 | 205.01 |
| 2023 | 173.59 | 140.75 | 206.43 |
| 2024 | 173.62 | 139.74 | 207.50 |
| 2025 | 173.63 | 138.96 | 208.30 |
| 2026 | 173.63 | 138.36 | 208.90 |
| 2027 | 173.61 | 137.88 | 209.35 |
| 2028 | 173.59 | 137.49 | 209.68 |
| 2029 | 173.55 | 137.18 | 209.92 |
| 2030 | 173.73 | 137.14 | 210.32 |
| 2031 | 173.90 | 137.15 | 210.65 |
| 2032 | 174.06 | 137.18 | 210.95 |
| 2033 | 174.21 | 137.23 | 211.20 |
| 2034 | 174.59 | 137.52 | 211.65 |
| 2035 | 174.95 | 137.83 | 212.07 |
| 2036 | 175.31 | 138.13 | 212.48 |
| 2037 | 175.66 | 138.45 | 212.87 |
| 2038 | 176.23 | 138.99 | 213.47 |
| 2039 | 176.79 | 139.53 | 214.05 |
| 2040 | 177.35 | 140.07 | 214.63 |
| 2041 | 177.90 | 140.61 | 215.20 |
| 2042 | 178.45 | 141.15 | 215.75 |
| 2043 | 178.99 | 141.68 | 216.30 |
| 2044 | 179.53 | 142.21 | 216.85 |
| 2045 | 180.06 | 142.74 | 217.38 |
| 2046 | 180.59 | 143.26 | 217.92 |
| 2047 | 181.11 | 143.78 | 218.44 |
| 2048 | 181.63 | 144.30 | 218.96 |
| 2049 | 182.15 | 144.81 | 219.48 |
| 2050 | 182.77 | 145.44 | 220.11 |
| 2051 | 183.40 | 146.06 | 220.73 |
| 2052 | 184.02 | 146.68 | 221.36 |
| 2053 | 184.63 | 147.29 | 221.97 |
| 2054 | 185.36 | 148.02 | 222.70 |

---

---

|      |        |        |        |
|------|--------|--------|--------|
| 2055 | 186.09 | 148.75 | 223.43 |
| 2056 | 186.81 | 149.47 | 224.15 |
| 2057 | 187.53 | 150.19 | 224.87 |
| 2058 | 188.36 | 151.02 | 225.70 |
| 2059 | 189.19 | 151.85 | 226.53 |
| 2060 | 190.03 | 152.68 | 227.37 |

---

Maternal mortality ratios are expressed per 100,000 live births.



Supplementary Figures

**Figure S1.** Interpolation of maternal mortality ratios.

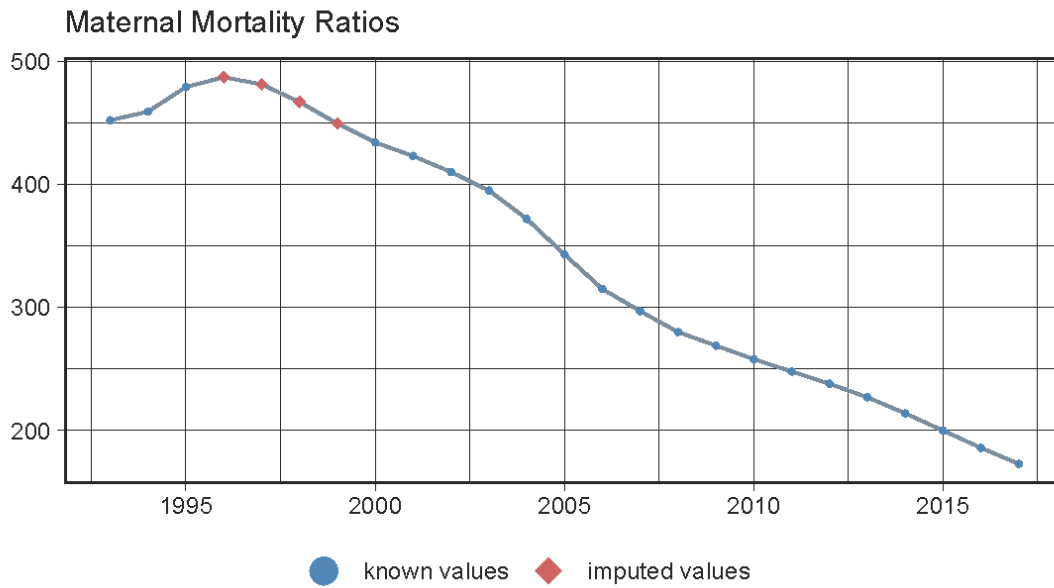

Maternal mortality ratios are expressed per 100,000 live births.

**Figure S2.** Interpolation of percentage of sample clusters with any health facilities within 5 km.

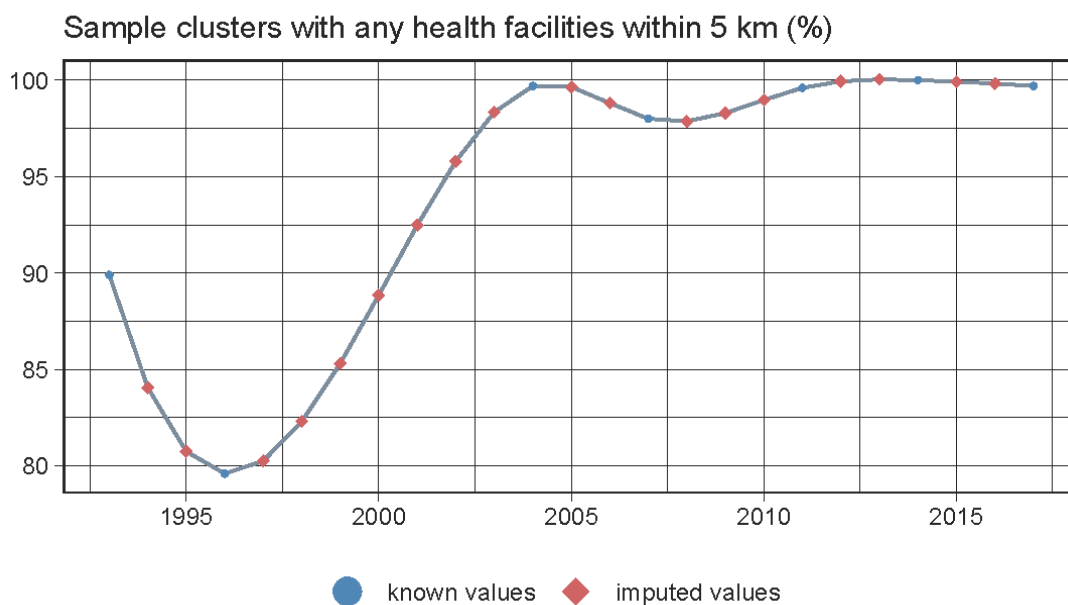

**Figure S3.** Interpolation of Percentage of Women Receiving Quality ANC.

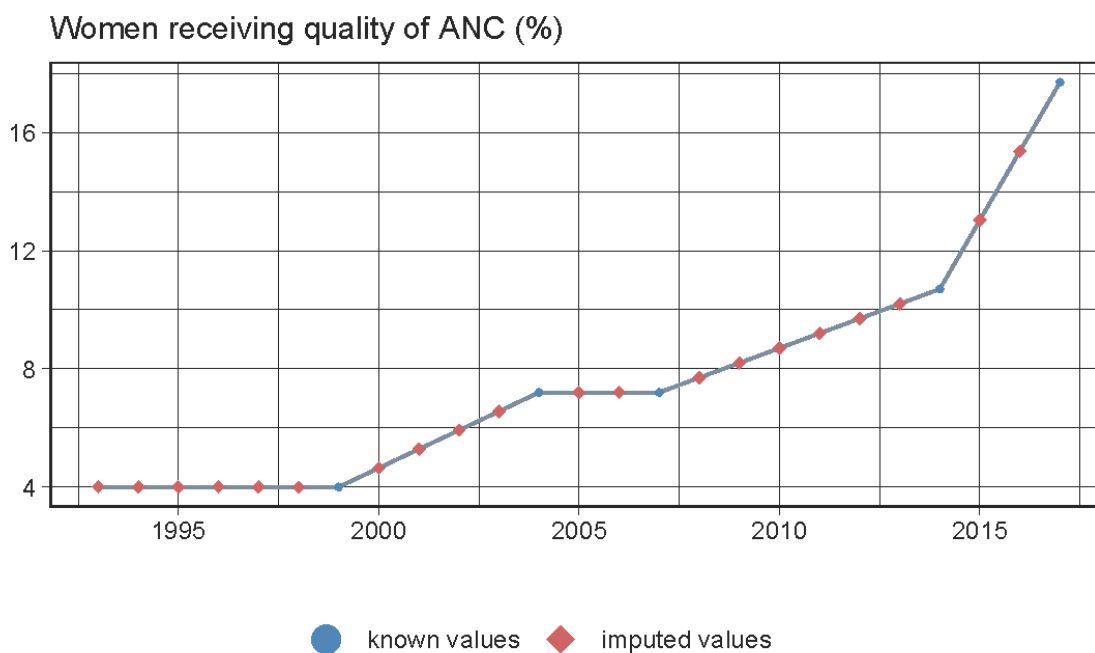

**Figure S4.** Interpolation of facility delivery rates.

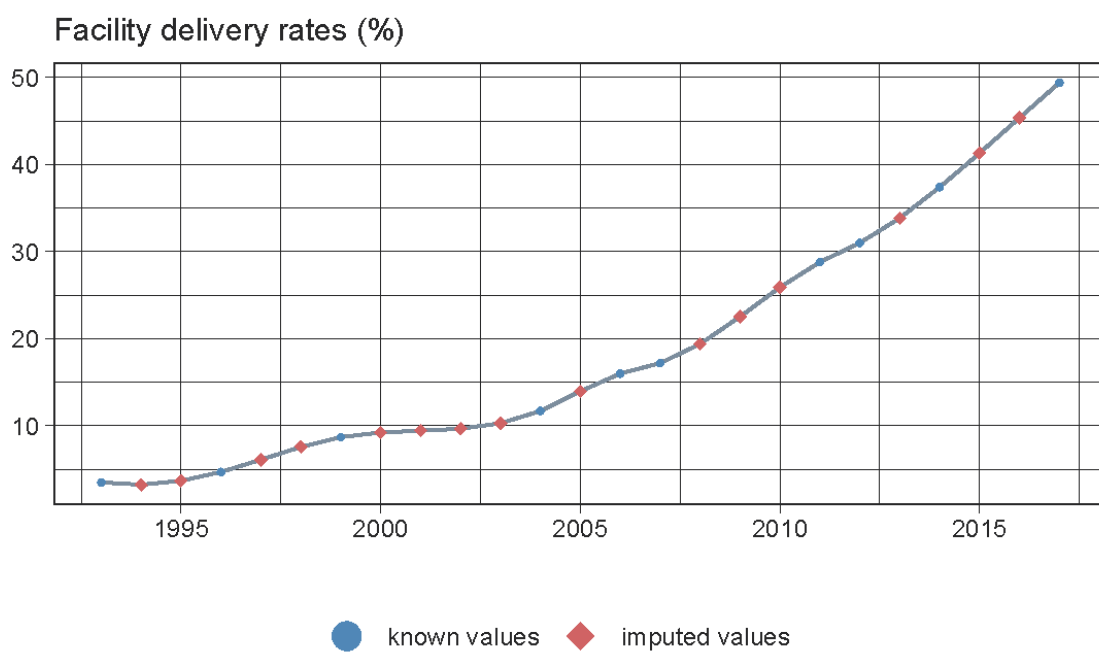

**Figure S5.** Observed and predicted maternal mortality ratios from 1993 to 2017.

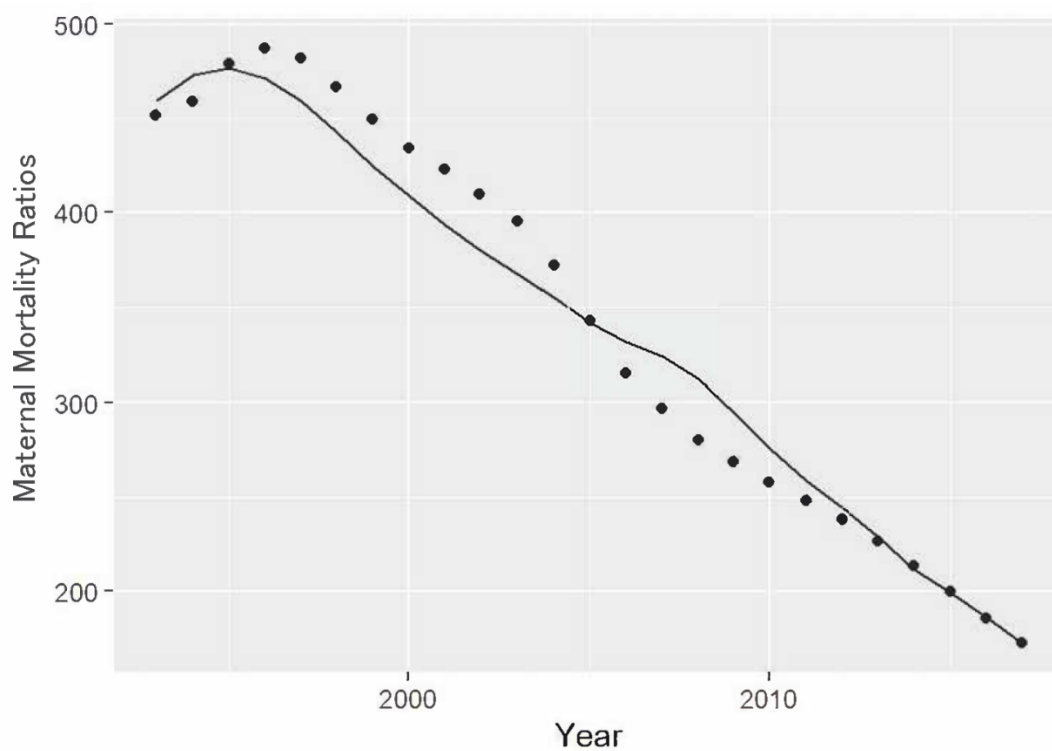

Maternal mortality ratios are expressed per 100,000 live births.

Line: predicted maternal mortality ratios, Points: observed maternal mortality ratios.
